# Supplementary material for: Multifunctional Finishing of Cotton with Compounds Derived from MCT-β-CD and Quantification of Effects Using MLR Statistical Analysis
Source: PubMed Central journal article supplement (PMC7865583; doi:10.3390/polym13030410), 2021-01-27
Supplement: polymers-13-00410-s001.pdf [file polymers-13-00410-s001.pdf]

Supplementary Materials

for

# Multifunctional finishing of cotton with compounds derived from MCT- $\beta$ -CD and quantification of effects using MLR statistical analysis

Vasilica Popescu<sup>1\*</sup>, Marioara Petrea<sup>2</sup> and Andrei Popescu<sup>3</sup>

<sup>1</sup> Department of Chemical Engineering in Textiles and Leather, "Gheorghe Asachi" Technical University of Iasi, 700050, Romania; e-mail: vpopescu65@tex.tuiasi.ro

<sup>2</sup> Department of Wood Processing and Design of Wood Products, "Transilvania" University of Brasov, 500068, Romania; e-mail: gmaria@unitbv.ro

<sup>3</sup> Department of Machine Design, Mechatronics and Robotics, "Gheorghe Asachi" Technical University of Iasi, 700050, Romania; e-mail: andrei.popescu@academic.tuiasi.ro

\* Correspondence: vpopescu65@tex.tuiasi.ro

\*Correspondence: vpopescu65@tex.tuiasi.ro

## Characterization of the reagents

- a) Chemical structures of reagents
- b) Characterization of  $\beta$ -cyclodextrin: chemical structure and properties

## Chemical reaction of D-CD with cellulose

## Results of statistical analysis

## Influence of treatment conditions on textile material integrity

## Antibacterial capacity

## References

## Characterization of the reagents

### a) Chemical structures of reagents

Table S1. Chemical structures of the utilized substances

| Substance name                                                                                             | Chemical                                                                                                                                                                 | Average molecular weigh (g/mol) |
|------------------------------------------------------------------------------------------------------------|--------------------------------------------------------------------------------------------------------------------------------------------------------------------------|---------------------------------|
| <b>Non-hydrated form of glyoxal</b>                                                                        | Glyoxal (monomer (M), anhydrous form)<br>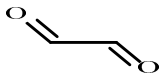                                              | 58                              |
| <b>The monohydrated (MH) and dihydrates (DH) forms of 40 % glyoxal solution:</b>                           | Monohydrated glyoxal (MH)<br>                                                           | 76                              |
|                                                                                                            | Ethane-1,1,2,2-tetraol (or bis gem-diol) (DH)<br>                                      | 94                              |
|                                                                                                            | Dimer type dioxalane: (1,3) dioxolane-4,5-trans-diol (MH)<br>                          | 150                             |
|                                                                                                            | Dimer type dioxalane (i.e. 2-dihydroxymethyl-(1,3) dioxolane-4,5-trans-diol) (DH)<br> | 152                             |
|                                                                                                            | Trimer: 2,2'-bi-1,3-dioxolanyl-4,4',5,5'tetraol (DH)<br>                             | 210                             |
| <b>Ethylenediamine</b>                                                                                     | ED<br>$\text{H}_2\text{N} - \text{CH}_2 - \text{CH}_2 - \text{NH}_2$                                                                                                     | 60                              |
| <b>Monochlorotriazinyl-<math>\beta</math>-cyclodextrin</b><br>or<br>Cavasol W7 MCT<br>or<br>Cavatex W7 MCT | MCT- $\beta$ -CD<br>                                                                 | 1560<br>for DS=2.8              |

### b) Characterization of $\beta$ -cyclodextrin: chemical structure and properties

The  $\beta$ -cyclodextrin (also named Schardinger dextrin, cycloglucose, cycloamylose, cycloglucoamylose) is a cyclic non-reductive oligosaccharide consisting of 7  $\alpha$ -D (+)- glucopyranosyl,  $\alpha$ -1,4 glycosidic connected units. The 7 units are arranged as a truncated cone empty inside (Figure S1). The hydroxyl groups are directed as follows: the secondary groups which are directly attached to glucopyranosyl ring are rigid, while the primary groups, O(6)H can rotate around the C(5)- C(6) bonds,

adopting the (-) or (+) *gauche* directions. The compound  $\beta$ -cyclodextrin contains 21 hydroxyl groups, whose reactivity decreases in the sequence O (6) H > O (2) H > O (3) H. Hydroxyl groups can participate in various chemical reactions (etherification, esterification, sulphonation).

Detailed characterization of  $\beta$ -cyclodextrin is presented in Table S2. The main structural characteristics of  $\beta$ -cyclodextrin [1-5] are shown in Figure S1.

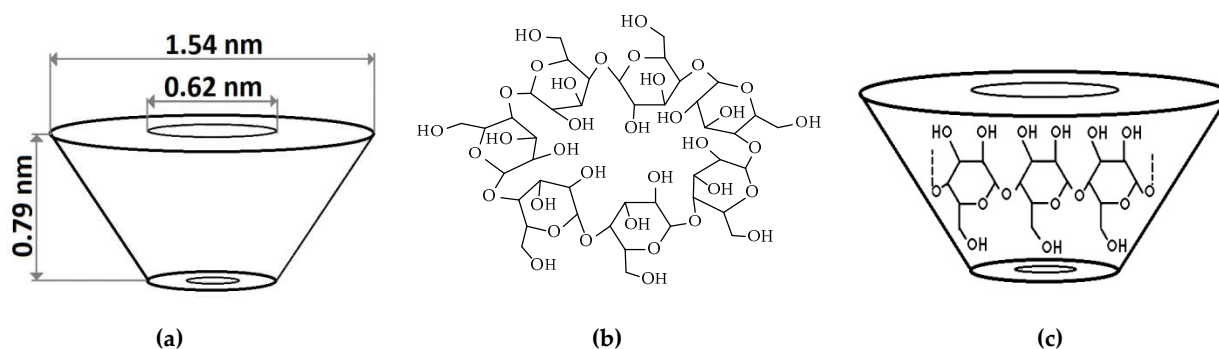

**Figure S1.** Structure of  $\beta$ -cyclodextrin: a) dimensions of toroid structure; b) chemical structure of  $\beta$ -CD; c)  $\beta$ -CD arrangement which generates a toroid form.

**Table S2.** The properties of  $\beta$ -cyclodextrin

| $\beta$ -cyclodextrin properties  | Values for the $\beta$ -cyclodextrin properties |
|-----------------------------------|-------------------------------------------------|
| Molecular mass                    | 1135                                            |
| Number of glucosidic units        | 7                                               |
| Diameter of the inner cavity (nm) | 0.62                                            |
| Outer diameter of macrocycle      | 1.54                                            |
| Conoid height (nm)                | 0.79                                            |
| Water solubility (g/100mL.25°C)   | 18.5                                            |
| Surface tension (mN/m)            | 71                                              |
| Melting point (°C)                | 255-265                                         |
| Crystallization in water          | 13-15                                           |
| Water molecules in cavities       | 11                                              |



Results of statistical analysis

WRA<sub>dry</sub>

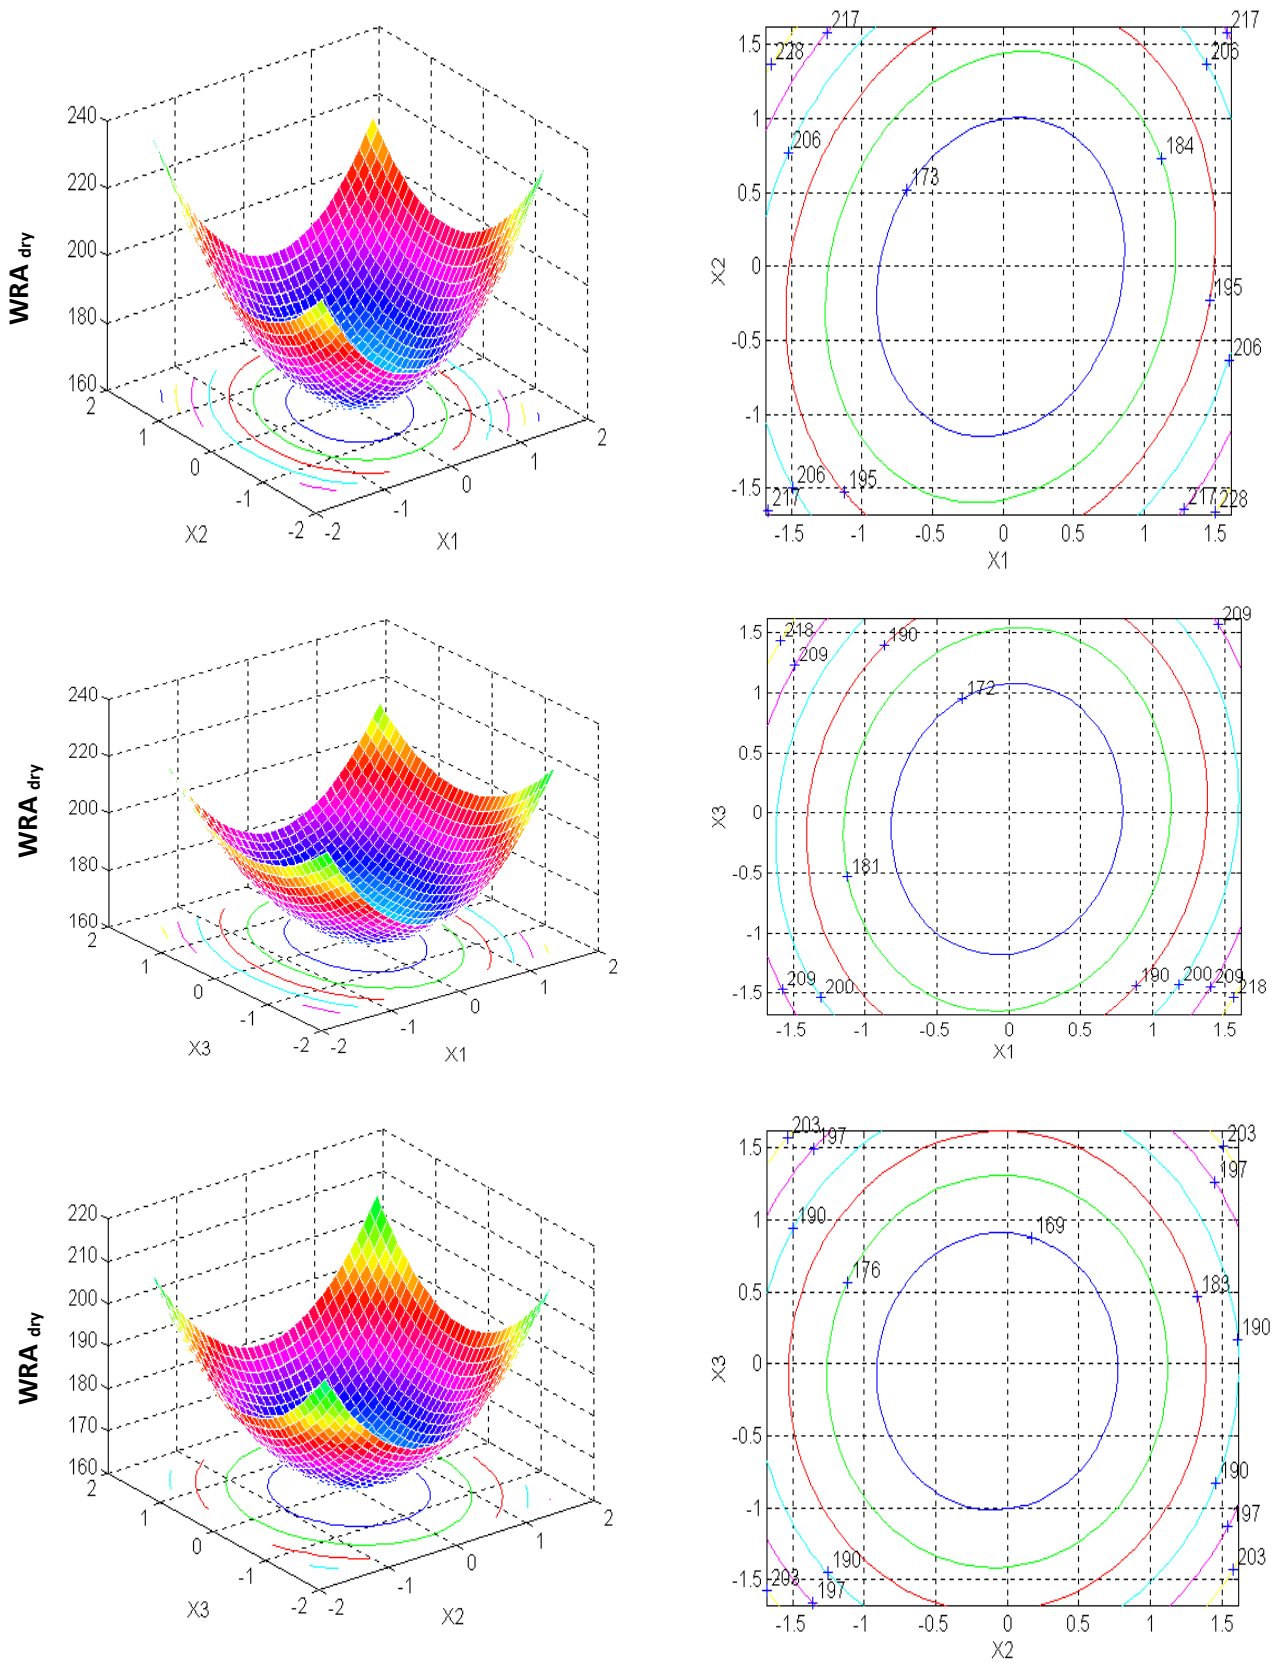

Figure S3. Graphical dependence of WRA<sub>dry</sub> on independent variables (X<sub>1</sub>, X<sub>2</sub> and X<sub>3</sub>) and level curves (their contour).

WRA<sub>wet</sub>

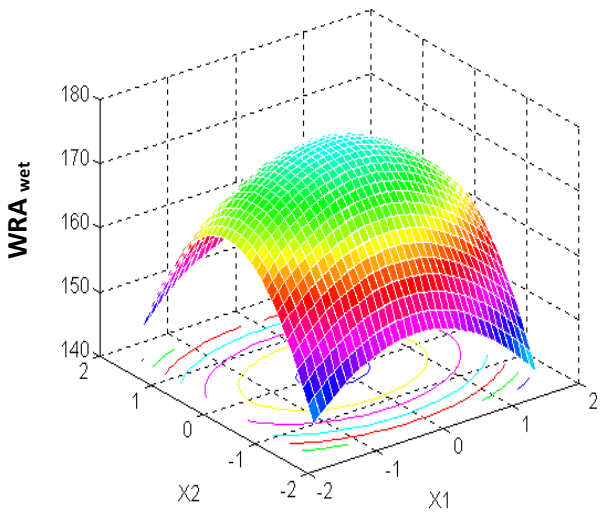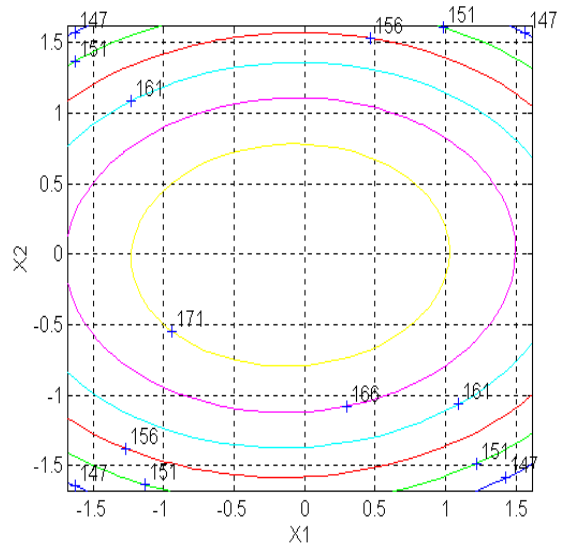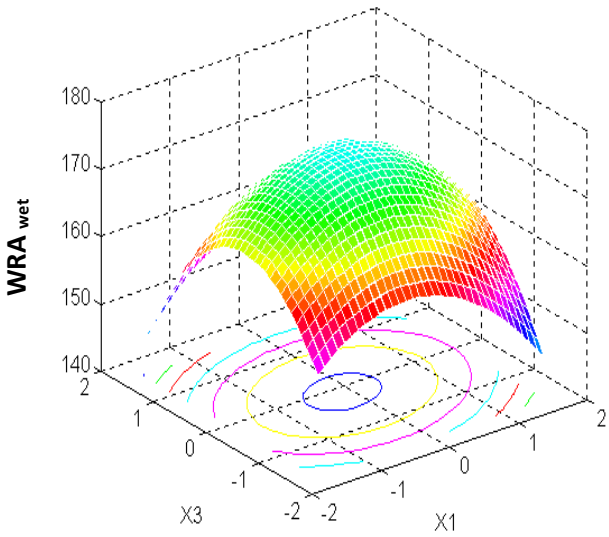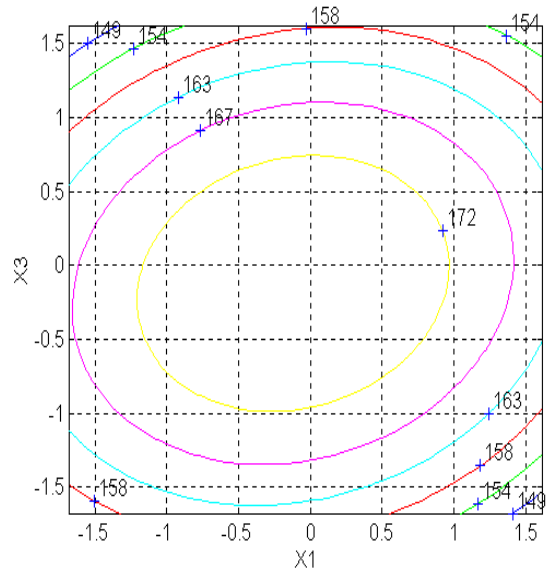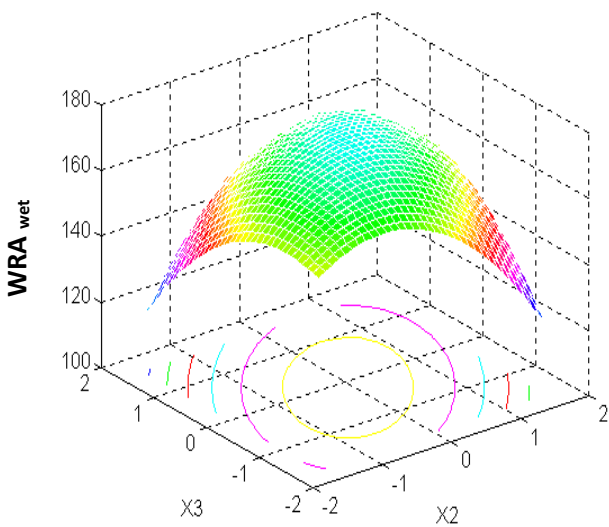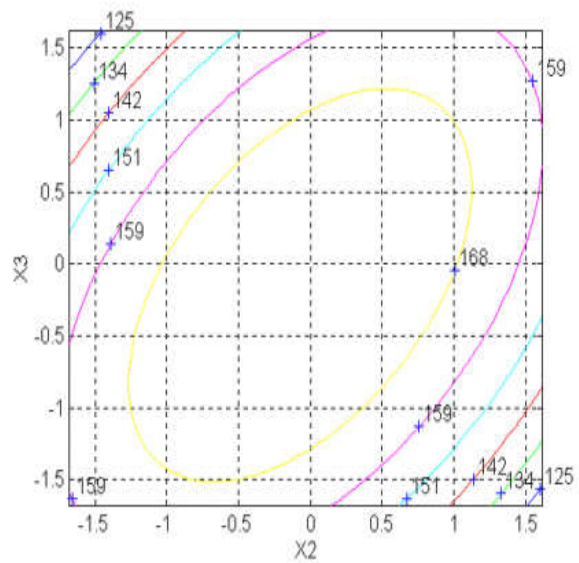

Figure S4. Graphical dependence of WRA<sub>wet</sub> on independent variables ( $X_1$ ,  $X_2$  and  $X_3$ ) and level curves (their contour).

Water absorption capacity (WAC)

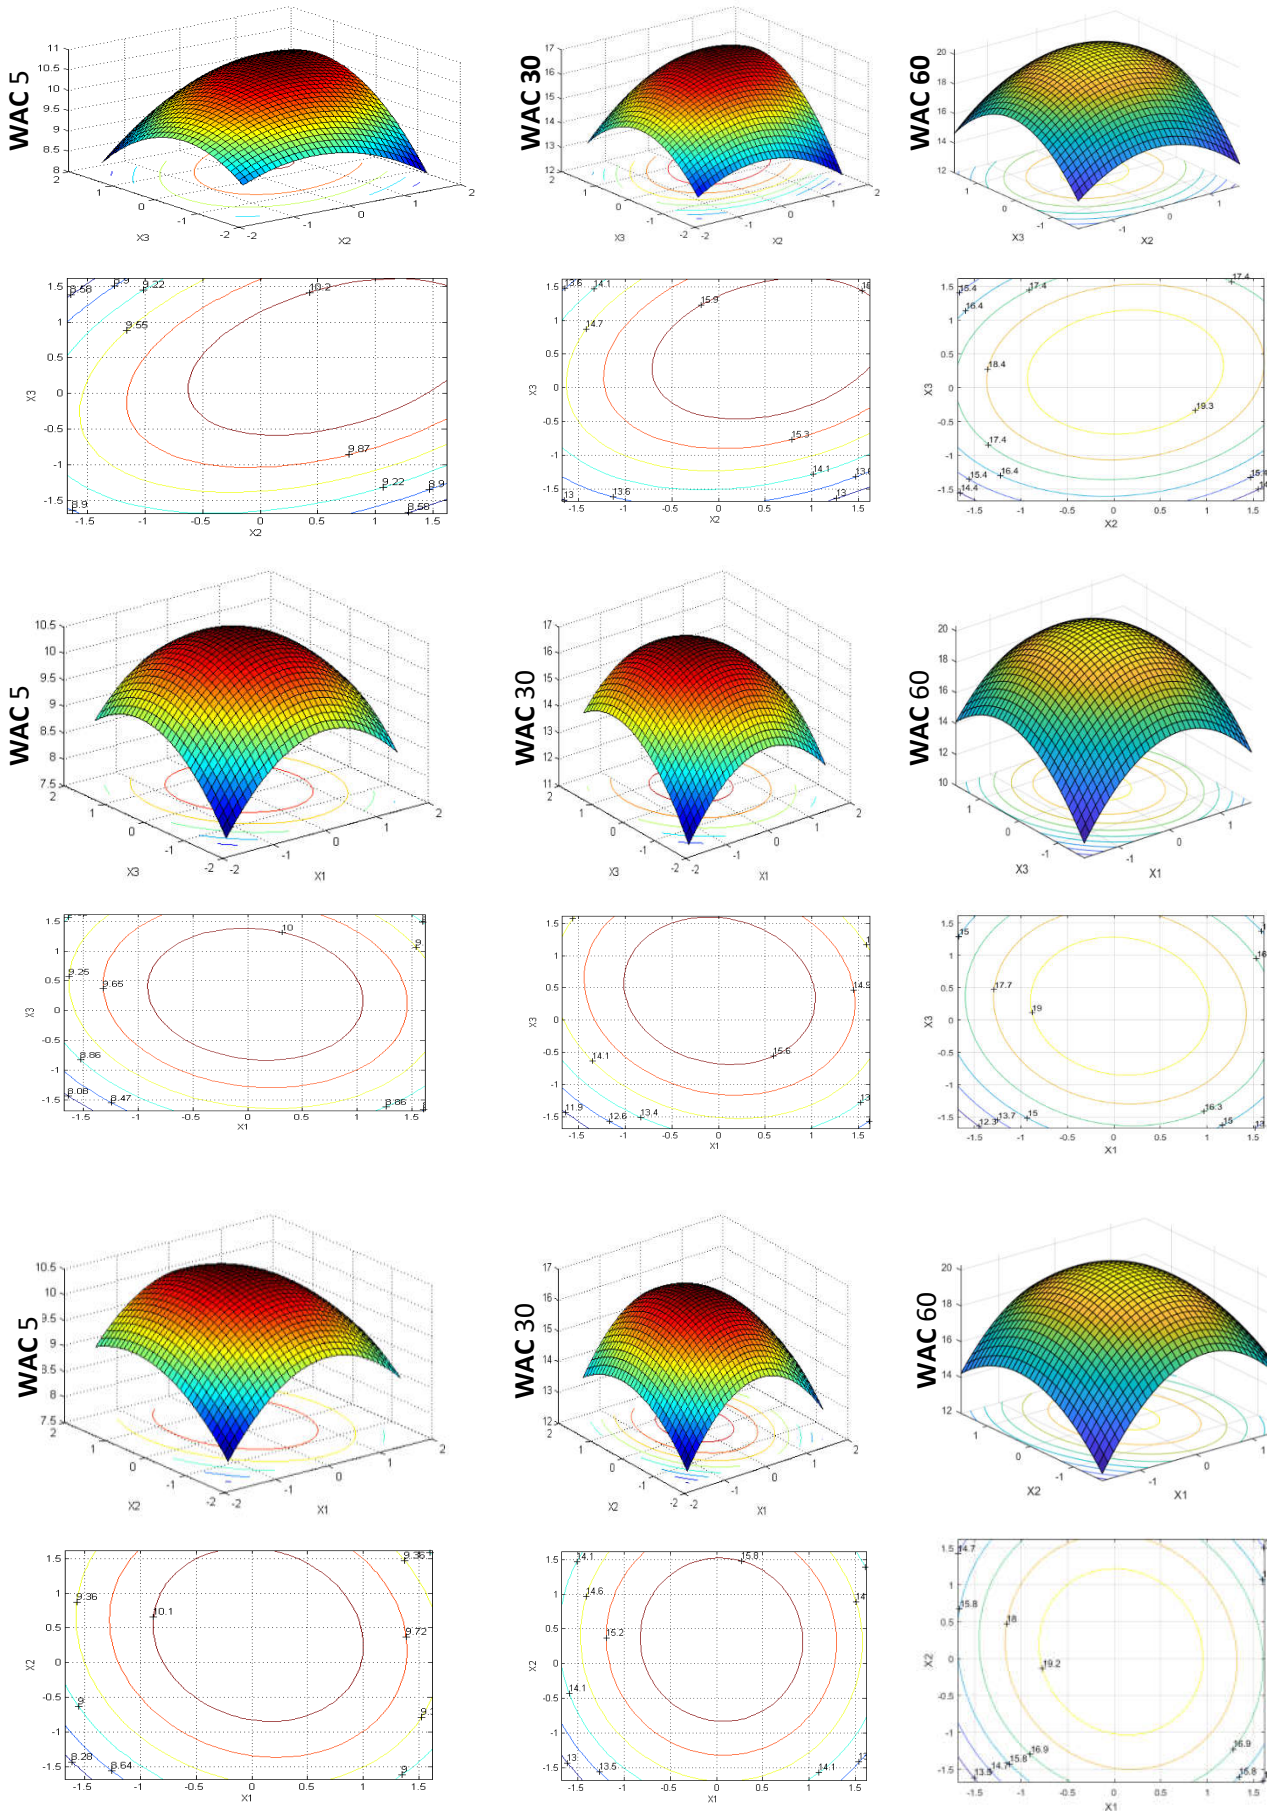

Figure S5. 3D graphical dependence of WAC on  $X_1$ ,  $X_2$  and  $X_3$  and level curves (their contour).

**Influence of treatment conditions on textile material integrity**

**Table S3.** Breaking strength along the warp and weft directions

| Sample  | Treatment conditions (Codes) |        |        | Treatment conditions (Real values) |               |               | Breaking strength (N) |         |
|---------|------------------------------|--------|--------|------------------------------------|---------------|---------------|-----------------------|---------|
|         | X1                           | X2     | X3     | X1<br>(% owf)                      | X2<br>(% owf) | X3<br>(% owf) | On warp               | On weft |
| Control | 0                            | 0      | 0      | 0                                  | 0             | 0             | 424.12                | 364.0   |
| S1      | -1                           | -1     | -1     | 5.4                                | 5.4           | 6.6           | 428.5                 | 339.2   |
| S2      | 1                            | -1     | -1     | 12.57                              | 5.4           | 6.6           | 471.5                 | 449.5   |
| S3      | -1                           | 1      | -1     | 5.4                                | 12.57         | 6.6           | 465.0                 | 420.0   |
| S4      | 1                            | 1      | -1     | 12.57                              | 12.57         | 6.6           | 408.5                 | 446.5   |
| S5      | -1                           | -1     | 1      | 5.4                                | 5.4           | 8.4           | 435.0                 | 380.8   |
| S6      | 1                            | -1     | 1      | 12.57                              | 5.4           | 8.4           | 398.5                 | 406.5   |
| S7      | -1                           | 1      | 1      | 5.4                                | 12.57         | 8.4           | 392.8                 | 460.5   |
| S8      | 1                            | 1      | 1      | 12.57                              | 12.57         | 8.4           | 374.0                 | 414.5   |
| S9      | -1.682                       | 0      | 0      | 3                                  | 9             | 7.5           | 354.8                 | 436.0   |
| S10     | +1.682                       | 0      | 0      | 15                                 | 9             | 7.5           | 406.5                 | 354.0   |
| S11     | 0                            | -1.682 | 0      | 9                                  | 3             | 7.5           | 434.0                 | 344.8   |
| S12     | 0                            | +1.682 | 0      | 9                                  | 15            | 7.5           | 409.5                 | 347.6   |
| S13     | 0                            | 0      | -1.682 | 9                                  | 9             | 6             | 435.5                 | 324.4   |
| S14     | 0                            | 0      | +1.682 | 9                                  | 9             | 9             | 400.0                 | 348.4   |
| S15     | 0                            | 0      | 0      | 9                                  | 9             | 7             | 438.0                 | 349.6   |



**Antibacterial activity**

**Table S4.** Showing off the antibacterial effects of the samples S4 and S8 against *Escherichia coli* and *Micrococcus luteus*

| Treatment                                                                                                                                                                                                                                                                                                                                                                                                                                                    | <i>Escherichia coli</i> (DSMZ 498)<br>(Gram-negative bacillus)                                                                                                                                                                                                                                                                                                       | <i>Micrococcus luteus</i> (ATCC 934)<br>(Gram-positive coccus)                                                                                                                                                                                                                                                                                                          |
|--------------------------------------------------------------------------------------------------------------------------------------------------------------------------------------------------------------------------------------------------------------------------------------------------------------------------------------------------------------------------------------------------------------------------------------------------------------|----------------------------------------------------------------------------------------------------------------------------------------------------------------------------------------------------------------------------------------------------------------------------------------------------------------------------------------------------------------------|-------------------------------------------------------------------------------------------------------------------------------------------------------------------------------------------------------------------------------------------------------------------------------------------------------------------------------------------------------------------------|
| <p><b>a) Without AgNO<sub>3</sub> treatment</b></p> <p>Sample codes:<br/>                     E = Control sample<br/>                     1' = Sample S4<br/>                     2' = Sample S4 washed 5 times<br/>                     3' = Sample S4 washed 10 times<br/>                     4' = Sample S8<br/>                     5' = Sample S8 washed 5 times<br/>                     6' = Sample S8 washed 10 times</p>                           | <p>Numbering on Petri dish lid</p>  <p>Image in strong artificial light</p>                                                                                                                        | <p>Numbering on Petri dish lid</p>  <p>Image in strong artificial light</p>  <p>Image in natural light</p>       |
| <p><b>a) With 5g/L AgNO<sub>3</sub> treatment</b></p> <p>Sample codes:<br/>                     E=Control sample (treated with AgNO<sub>3</sub>)<br/>                     1 = Sample S4<br/>                     2 = Sample S4 washed 5 times<br/>                     3 = Sample S4 washed 10 times<br/>                     4 = Sample S8<br/>                     5 = Sample S8 washed 5 times<br/>                     6 = Sample S8 washed 10 times</p> | <p>Numbering on Petri dish lid</p>  <p>Image in strong artificial light</p>  <p>Image in natural light</p>  | <p>Numbering on Petri dish lid</p>  <p>Image in strong artificial light</p>  <p>Image in natural light</p>  |

**Table S5** Showing off the antibacterial effects of the samples S12 and S11 against *Escherichia coli* and *Micrococcus luteus*

| Treatment                                                                                                                                                                                                     | <i>Escherichia coli</i> (DSMZ 498)<br>(Gram-negative bacillus)                      | <i>Micrococcus luteus</i> (ATCC 934)<br>(Gram-positive coccus)                      |
|---------------------------------------------------------------------------------------------------------------------------------------------------------------------------------------------------------------|-------------------------------------------------------------------------------------|-------------------------------------------------------------------------------------|
| <b>a) Without AgNO<sub>3</sub> treatment</b>                                                                                                                                                                  | Numbering on Petri dish lid                                                         | Numbering on Petri dish lid                                                         |
| Sample codes:<br>E = Control sample<br>1 = Sample S11<br>2 = Sample S11 washed 5 times<br>3 = Sample S11 washed 10 times<br>4 = Sample S12<br>5 = Sample S12 washed 5 times<br>6 = Sample S12 washed 10 times |    |   |
|                                                                                                                                                                                                               | Image in strong artificial light                                                    | Image in strong artificial light                                                    |
|                                                                                                                                                                                                               |    |   |
|                                                                                                                                                                                                               |                                                                                     | Image in natural light                                                              |
|                                                                                                                                                                                                               |                                                                                     |  |
| <b>b) With 5g/L AgNO<sub>3</sub> treatment</b>                                                                                                                                                                | Numbering on Petri dish lid                                                         |                                                                                     |
| Sample codes:<br>E = Control sample (treated with AgNO <sub>3</sub> )<br>1 = Sample S11<br>2 = Sample S11 washed 5 times<br>3 = Sample S11 washed 10 times<br>4 = Sample S12<br>5 = Sample S12 washed 5 times |  |                                                                                     |
|                                                                                                                                                                                                               | Image in strong artificial light                                                    |                                                                                     |
|                                                                                                                                                                                                               |  |                                                                                     |
|                                                                                                                                                                                                               | Image in natural light                                                              |                                                                                     |
|                                                                                                                                                                                                               |  |                                                                                     |

## References\*

1. Wacker Chemie GmbH. Technical Information Sheet CAVATEX W7 MC, **2003**.
2. Szejtli, J. Cyclodextrins and their inclusion complexes. Budapest: Akademiai Kiado, **1982**.
3. Szejtli, J. Introduction and General Overview of Cyclodextrin Chemistry. *Chemical Reviews* **1998**, *98*, 1743-1754
4. Szejtli, J. Utilization of cyclodextrins in industrial products and processes. *J. Mater. Chem.*, **1997**, *7*, 575-587.
5. Saenger, W.; Steiner, T. Cyclodextrin Inclusion Complexes: Host-Guest Interactions and Hydrogen-Bonding Networks. *Acta Cryst.* **1998**, *A54*, 798-805.

---

*\*the references correspond to numbers 34-38 in the manuscript*
